# Supplementary material for: Low total and free triiodothyronine levels are associated with insulin resistance in non-diabetic individuals
Source: PubMed Central journal article supplement (PMC6048097; doi:10.1038/s41598-018-29087-1), 2018-07-16
Supplement: 41598_2018_29087_MOESM1_ESM.pdf [file 41598_2018_29087_MOESM1_ESM.pdf]

**Low total and free triiodothyronine levels are associated with insulin resistance in non-diabetic individuals**

**Short title: Thyroid hormones and insulin resistance**

Chih-Yuan Wang<sup>1,2,\*</sup>, Tse-Ya Yu<sup>3</sup>, Shyang-Rong Shih<sup>1,2</sup>, Kuo-Chin Huang<sup>4</sup>, Tien-Chun Chang<sup>1,2</sup>

<sup>1</sup> Division of Endocrinology and Metabolism, Department of Internal Medicine, National Taiwan University Hospital, Taipei 100, Taiwan

<sup>2</sup> Department of Internal Medicine, College of Medicine, National Taiwan University, Taipei 100, Taiwan

<sup>3</sup> Health Management Center, Far-Eastern Memorial Hospital, New Taipei City 222, Taiwan

<sup>4</sup> Department of Family Medicine, National Taiwan University Hospital, Taipei 100, Taiwan

\*Corresponding author: Chih-Yuan Wang, MD, Ph.D

Division of Endocrinology and Metabolism, Department of Internal Medicine, National Taiwan University Hospital and Department of Internal Medicine, College of Medicine, National Taiwan University, Taipei 100, Taiwan

TEL: +886-2-23123456 ext 63864

FAX: +886-2-23934176

Email: [cyw1965@gmail.com](mailto:cyw1965@gmail.com)

**Supplemental Table 1. Relations between subject characteristics and insulin resistance**

| Variables                                   | Univariate                  |
|---------------------------------------------|-----------------------------|
|                                             | Coefficient (95% CI)        |
| <b>Demographic data</b>                     |                             |
| Age                                         |                             |
| 20-40 years                                 | Reference                   |
| 41-60 years                                 | 0.163 (-0.164, 0.490)       |
| ≥ 61 years                                  | 0.143 (-0.123, 0.410)       |
| Sex                                         |                             |
| Female                                      | Reference                   |
| Male                                        | 0.240 (-0.042, 0.522)       |
| Race                                        |                             |
| Non-Hispanic white                          | Reference                   |
| Non-Hispanic black                          | 0.061 (-0.394, 0.517)       |
| Mexican American                            | <b>0.818 (0.467, 1.169)</b> |
| Other Hispanic                              | 0.533 (-0.243, 1.308)       |
| Other race                                  | 0.107 (-0.494, 0.708)       |
| <b>Comorbidities</b>                        |                             |
| Liver function                              |                             |
| Normal                                      | Reference                   |
| Poor                                        | <b>1.320 (0.854, 1.785)</b> |
| Chronic kidney disease                      |                             |
| No, eGFR ≥ 60 (mL/min/1.73m <sup>2</sup> )  | Reference                   |
| Yes, eGFR < 60 (mL/min/1.73m <sup>2</sup> ) | -0.222 (-0.546, 0.102)      |
| Cardiovascular disease                      |                             |
| No                                          | Reference                   |
| Yes                                         | 0.403 (-0.011, 0.816)       |
| Depression                                  |                             |
| No                                          | Reference                   |
| Yes                                         | 0.594 (-0.179, 1.367)       |
| Obesity                                     |                             |
| No                                          | Reference                   |
| Yes                                         | <b>2.076 (1.750, 2.403)</b> |
| Hypertension                                |                             |
| No                                          | Reference                   |
| Yes                                         | <b>1.020 (0.670, 1.370)</b> |
| Dyslipidemia                                |                             |
| No                                          | Reference                   |
| Yes                                         | <b>0.738 (0.454, 1.022)</b> |
| <b>Health behavior</b>                      |                             |

|                                         |                                |
|-----------------------------------------|--------------------------------|
| Smoking                                 |                                |
| Never                                   | Reference                      |
| Former                                  | 0.050 (-0.174, 0.275)          |
| Current                                 | <b>-0.278 (-0.550, -0.005)</b> |
| Alcohol consumption                     |                                |
| Never                                   | Reference                      |
| Former drinker                          | 0.297 (-0.227, 0.821)          |
| Current drinker                         | 0.053 (-0.224, 0.330)          |
| Physical activity                       |                                |
| Metabolic equivalent of task $\geq$ 600 | Reference                      |
| Metabolic equivalent of task $<$ 600    | <b>0.590 (0.237, 0.942)</b>    |
| Vigorous recreational activity          |                                |
| No                                      | Reference                      |
| Yes                                     | <b>-0.622 (-0.850, -0.394)</b> |
| Moderate recreational activity          |                                |
| No                                      | Reference                      |
| Yes                                     | -0.339 (-0.697, 0.018)         |
| <b>Laboratory studies</b>               |                                |
| Two Hour Glucose (mmol/L)               | <b>0.290 (0.224, 0.357)</b>    |
| Glycohemoglobin (%)                     |                                |
| $<$ 5.5                                 | Reference                      |
| 5.5-6.4                                 | <b>0.807 (0.507, 1.107)</b>    |
| $\geq$ 6.5                              | 0.762 (-0.324, 1.847)          |
| High-density lipoprotein (mmol/L)       | <b>-1.790 (-2.280, -1.301)</b> |
| Triglyceride (mmol/L)                   | <b>0.481 (0.261, 0.701)</b>    |
| Serum vitamin D                         |                                |
| Normal ( $>$ 75 nmol/L)                 | Reference                      |
| Insufficiency (50 – 75 nmol/L)          | <b>0.689 (0.203, 1.175)</b>    |
| Deficiency ( $<$ 50 nmol/L)             | <b>1.000 (0.442, 1.558)</b>    |
| C-reactive protein (mg/dL)              | <b>1.016 (0.507, 1.525)</b>    |

---

CI, confidence interval; eGFR, estimated glomerular filtration rate.  
 Bold indicates significant factor,  $p < 0.05$ .

**Supplemental Table 2. Relations between thyroid hormone levels and insulin resistance adjusting for different factors.**

|                                                  | <b>Model 1</b>                 | <b>Model 2</b>                 | <b>Model 3</b>                 |
|--------------------------------------------------|--------------------------------|--------------------------------|--------------------------------|
|                                                  | Coefficient (95% CI)           | Coefficient (95% CI)           | Coefficient (95% CI)           |
| <b>Thyroid stimulating hormone (TSH) (mIU/L)</b> |                                |                                |                                |
| Normal (0.24-5.4 mIU/L)                          | Reference                      | Reference                      | Reference                      |
| Low (< 0.24 mIU/L)                               | -0.542 (-1.191, 0.107)         | <b>-0.663 (-1.170, -0.156)</b> | <b>-0.593 (-1.091, -0.095)</b> |
| High (> 5.4 mIU/L)                               | 0.159 (-0.598, 0.916)          | 0.306 (-0.361, 0.973)          | 0.376 (-0.288, 1.040)          |
| <b>Total triiodothyronine (TT3) (ng/dL)</b>      |                                |                                |                                |
| Normal (87-178 ng/dL)                            | Reference                      | Reference                      | Reference                      |
| Low (< 87 ng/dL)                                 | <b>-0.745 (-1.210, -0.281)</b> | <b>-0.470 (-0.903, -0.037)</b> | <b>-0.437 (-0.859, -0.015)</b> |
| High (> 178 ng/dL)                               | 0.756 (-0.070, 1.582)          | 0.363 (-0.373, 1.099)          | 0.415 (-0.372, 1.202)          |
| <b>Free triiodothyronine (FT3) (pg/mL)</b>       |                                |                                |                                |
| Normal (2.5-3.9 pg/mL)                           | Reference                      | Reference                      | Reference                      |
| Low (< 2.5 pg/mL)                                | -0.837 (-1.678, 0.003)         | <b>-0.784 (-1.444, -0.124)</b> | <b>-0.821 (-1.399, -0.242)</b> |
| High (> 3.9 pg/mL)                               | <b>0.370 (0.073, 0.668)</b>    | 0.110 (-0.305, 0.525)          | -0.006 (-0.454, 0.443)         |
| <b>Total thyroxine (TT4) (ug/dL)</b>             |                                |                                |                                |
| Normal (6.1-12.2 ug/dL)                          | Reference                      | Reference                      | Reference                      |
| Low (< 6.1 ug/dL)                                | -0.097 (-0.518, 0.324)         | -0.081 (-0.410, 0.248)         | -0.115 (-0.470, 0.240)         |
| High (> 12.2 ug/dL)                              | -0.035 (-0.642, 0.572)         | -0.045 (-0.479, 0.388)         | 0.048 (-0.379, 0.474)          |
| <b>Free thyroxine (FT4) (ng/dL)</b>              |                                |                                |                                |
| Normal (0.6-1.6 ng/dL)                           | Reference                      | Reference                      | Reference                      |
| Low (< 0.6 ng/dL)                                | <b>1.776 (0.181, 3.372)</b>    | <b>1.656 (0.211, 3.101)</b>    | 1.514 (-0.001, 3.030)          |
| High (> 1.6 ng/dL)                               | -0.718 (-1.963, 0.528)         | -0.131 (-1.269, 1.007)         | -0.066 (-1.222, 1.090)         |
| <b>Thyroglobulin (ng/mL)</b>                     |                                |                                |                                |
| Normal (0-35.0 ng/mL)                            | Reference                      | Reference                      | Reference                      |
| High (> 35.0 ng/mL)                              | 0.639 (-0.064, 1.342)          | 0.441 (-0.302, 1.185)          | 0.497 (-0.256, 1.251)          |
| <b>Thyroid peroxidase antibody (IU/mL)</b>       |                                |                                |                                |
| Normal (0-9.0 IU/mL)                             | Reference                      | Reference                      | Reference                      |
| High (> 9.0 IU/mL)                               | -0.050 (-0.462, 0.361)         | -0.014 (-0.380, 0.352)         | -0.039 (-0.391, 0.313)         |

CI, confidence interval.

Model 1: Adjusted for thyroid hormone and glycohemoglobin.

Model 2: Adjusted for thyroid hormone, glycohemoglobin, and obesity.

Model 3: Adjusted for thyroid hormone, glycohemoglobin, obesity and liver function.

Bold indicates significant factor,  $p < 0.05$ .
